# Supplementary material for: Bacterial Indole-3-Acetic Acid Influences Soil Nitrogen Acquisition in Barley and Chickpea
Source: MDPI journal article supplement (doi:10.3390/plants10040780), 2021-04-16
Supplement: s1 [file plants-1113772-SI.pdf › plants-1113772-SI.pdf]

## Supplementary data

|       |                                                               |     |
|-------|---------------------------------------------------------------|-----|
| M5a1  | MQPTYTIGDYLLDRLVDCGIDRLFGVPGDYNLQFLDSVIAHRNLGWVGCANLNAAYAAD   | 60  |
| SGM81 | MQPTYTIGDYLLDRLVDCGIDRLFGVPGDYNLQFLDRVIAHNALGWVGCANELNAAYAAD  | 60  |
| SSN1  | MQPTYTIGDYLLDRLVDCGIDRLFGVPGDYNLQFLDRVIAHNALGWVGCANELNAAYAAD  | 60  |
|       | *****.*****                                                   |     |
| M5a1  | GYARIKAGALLTTYGVGELSALNGIAGSYAEHVPVLHIVGAPCTGAQQRGELLHHTLGD   | 120 |
| SGM81 | GYARIKAGALLTTYGVGELSALNGVAGSYAEHIPVLHIVGAPSTGAQQRGELLHHTLGD   | 120 |
| SSN1  | GYARIKAGALLTTYGVGELSALNGVAGSYAEHIPVLHIVGAPSTGAQQRGELLHHTLGD   | 120 |
|       | *****:*****:*****.*****                                       |     |
| M5a1  | GDFSHFSRMSEQITCSQAVLAAGNACHEIDRVLSEMLTHHRPGYLMLPADVAKAKTTPPA  | 180 |
| SGM81 | GDFRHFARMSEQITCSQALLTAGNACHEIDRVLRDMLTHHRPGYLMLPADVARAAAIAPA  | 180 |
| SSN1  | GDFRHFARMSEQITCSQALLTAGNACHEIDRVLRDMLTHHRPGYLMLPADVARAAAIAPA  | 180 |
|       | *** **.******:*****:*****:*****:***                           |     |
| M5a1  | HRLLIQGLPADENQLAGFREHAGRMLRSSRRVSLADFLAQRYGLQNALREWVAKVPVAY   | 240 |
| SGM81 | QRLLEAAPADENQFAGFCEHASRLLRGSRISLLADFLAQRYGLQNTLREWVAKTPVAH    | 240 |
| SSN1  | QRLLEAAPADENQLAGFCEHASRLLRGSRISLLADFLAQRYGLQNTLREWVAKTPVAH    | 240 |
|       | :***:..*****:*** **.*:*** **.*:*****:*****:***:               |     |
| M5a1  | ATMLMGKGLFDEQQSGFVGTYSGLASAEETRAIENADTIICIGTRFTDTITAGFTQHLP   | 300 |
| SGM81 | ATMLMGKGLFDEQQRGFVGTYSGLASAPQTREAIENADTIICIGTRFTDTITAGFTQHLP  | 300 |
| SSN1  | ATMLMGKGLFDEQQRGFVGTYSGLASAPQTREAIENADTIICIGTRFTDTITAGFTQHLP  | 300 |
|       | ***** *****:***:*****                                         |     |
| M5a1  | LEKTIEIQPFAPVRVADRWFSPRIPEKALAILIELSASLAAEWVSPNIQAPGVSGAPEGSL | 360 |
| SGM81 | RDKTIEIQPFAPVRVGDHWFSGVPMQALALMTLSAPLAAEWAAPQVVAPEVEEGADGEL   | 360 |
| SSN1  | RDKTIEIQPFAPVRVGDHWFSGVPMQALALMTLSAPLAAEWAAPQVVAPEVEEGADGEL   | 360 |
|       | :*****.*:*** **:*** *: *** **.*:***: ** *. .:*.*              |     |
| M5a1  | TQKNFWNTVQKQLRPGDIIADQGAFAFGAAALKLPVDATLIVQPLWGSIGFTLPAAYGA   | 420 |
| SGM81 | TQKNFWATVQGALRPGDIIADQGTAAFGIAALKLPSEASLIVQPLWGSIGFTLPAAYGA   | 420 |
| SSN1  | TQKNFWATVQGALRPGDIIADQGTAAFGIAALKLPSEASLIVQPLWGSIGFTLPAAYGA   | 420 |
|       | ***** ** ***** *****:***:*****                                |     |
| M5a1  | QIAAAERRVVLIVGDGAQLTIQELGSMRLDKQRPLILLNNEGYTVRAIHGPEQRYND     | 480 |
| SGM81 | QTAAAEERRVVLIVGDGAQLTIQEMGSMRLDKQKPLILLNNEGYTVRAIHGPEQRYND    | 480 |
| SSN1  | QTAAAEERRVVLIVGDGAQLTIQEMGSMRLDKQKPLILLNNEGYTVRAIHGPEQRYND    | 480 |
|       | * *****:*****:*****                                           |     |
| M5a1  | IALWDWNRLPDAFAPDVPSRCWRVTRTQELQEAMNSSVASDRLTLVEVMLPKMDIPDFLR  | 540 |
| SGM81 | IALWDWRRLPEAFAPDVASRCWRVTHTDELREAMAESITSDMLTLVEVMLPKMDIPDFLR  | 540 |
| SSN1  | IALWDWRRLPEAFAPDVASRCWRVTHTDELREAMAESITSDMLTLVEVMLPKMDIPDFLR  | 540 |
|       | *****.*:***** *****:***:*** *:*** *****                       |     |
| M5a1  | TVTQALEERNRSRV                                                | 553 |
| SGM81 | AVTQALEERNRSRV                                                | 553 |
| SSN1  | AVTQALEERNRSRV                                                | 553 |
|       | *****                                                         |     |

**Figure S1.** Multiple Sequence alignment of ipdC derived amino acid sequence of indole pyruvate decarboxylase of *Klebsiella* SGM 81, *Klebsiella* SSN1 and *Klebsiella* M5a1, using Clustal O. Highlighted motifs (yellow) and residues involved in Mg<sup>2+</sup> binding (red), thiamine pyrophosphate binding (blue highlighted) are identical to those of the functional IpdC of *Enterobacter cloacae*, for which the structure and function has been detailed [1][3]

>SGM81 *ipdC* promoter seq (400nt before the translational start codon ATG)

CCGCCGAGCCCCGGCGGGCCCCATAGTTGTTGGCCAGGTCGAAATGGGTAATGCCGAGGTCA  
AACGCGTGCTGGAGCATCTGCCGGCTGGTTTCCACCCGCGTTTCATCGCCAAAGTTATGCCAC  
AGACCGAGAGAAATTGCCGGCAGCTGAAGGCCGCTGCGGCCGAGCGACGATAGGCCATCG  
TTTGATATCGCGTGGTACTTGCCTGGTAAACATTCTTCCTCCGCAGATAAAACAGGGTGTGTA  
TACGTTTACACTAATCAATGTTCTGCGTGGAGTACATCGCTTTTTTGGCGTAATTATTGCTTTA  
CACCGCCTTTATCACCCCTTTCTGGACAGGCGGATCGCTTATTCAATACTCAAATTACACCT  
GCGCCAAAATGAGGAAAATGGAT

>M5a1 *ipdC* promoter seq (400nt before the translational start codon ATG)

CTCTCCGCCGATCCCGCGGTGGCCCGTAGTTATTGGCTAAATCGAAATGGGTTATGCCGAGA  
TCGAATGCGTGACGCAGAAGCTGACGGCTGGTTTCCACCCGCGTTTCATCGCCAAAATTATGC  
CAAAGCCCCAGAGAACTGCCGGTAGCTTTAGTCCGCTATGACCGCAGCGGCGGTATTCCAT  
CGTTTGATATCGCGTGGCGTTTGCCTGGTAAACCATACTTCCTCCGCAGATAAAACAGGGTTG  
TGTATACGTTTACACTAAAGAATCTTTGGCGCCGAGTATACTCCCTGAACGCGTAAATTTTAC  
TTGCCACCGCATTTGTTGGGTGCAATGTGGACAGCGCAACTGCTTATTCAATACTCAACTTAT  
CTGCATGAGAGGAGAGTGGGGAT

**Figure S2.** Inspection of potential  $s^{54}$  promoters of *ipdC* in SGM81 and M5a1, 400 nucleotides before the translational start codon ATG. SGM81 has two near perfect  $s^{54}$  promoters with regards to the near invariable putative -24 GG and the -12 GC motifs (red) and their conserved next neighbour nucleotides according to Barrios et al. [2](T at -25, CA at -22-21, TT at -14-13). Importantly the exact spacing of 10 nucleotides between the -24 GG and -12 CC is stringent for  $s^{54}$  recognition and has been validated experimentally to be required for various  $s^{54}$  dependent promoters [3]. The spacing between the two putative GG – GC motifs of M5a1 (red) are 9 and 11 nucleotides, suggesting these are pseudo  $s^{54}$  binding motifs.

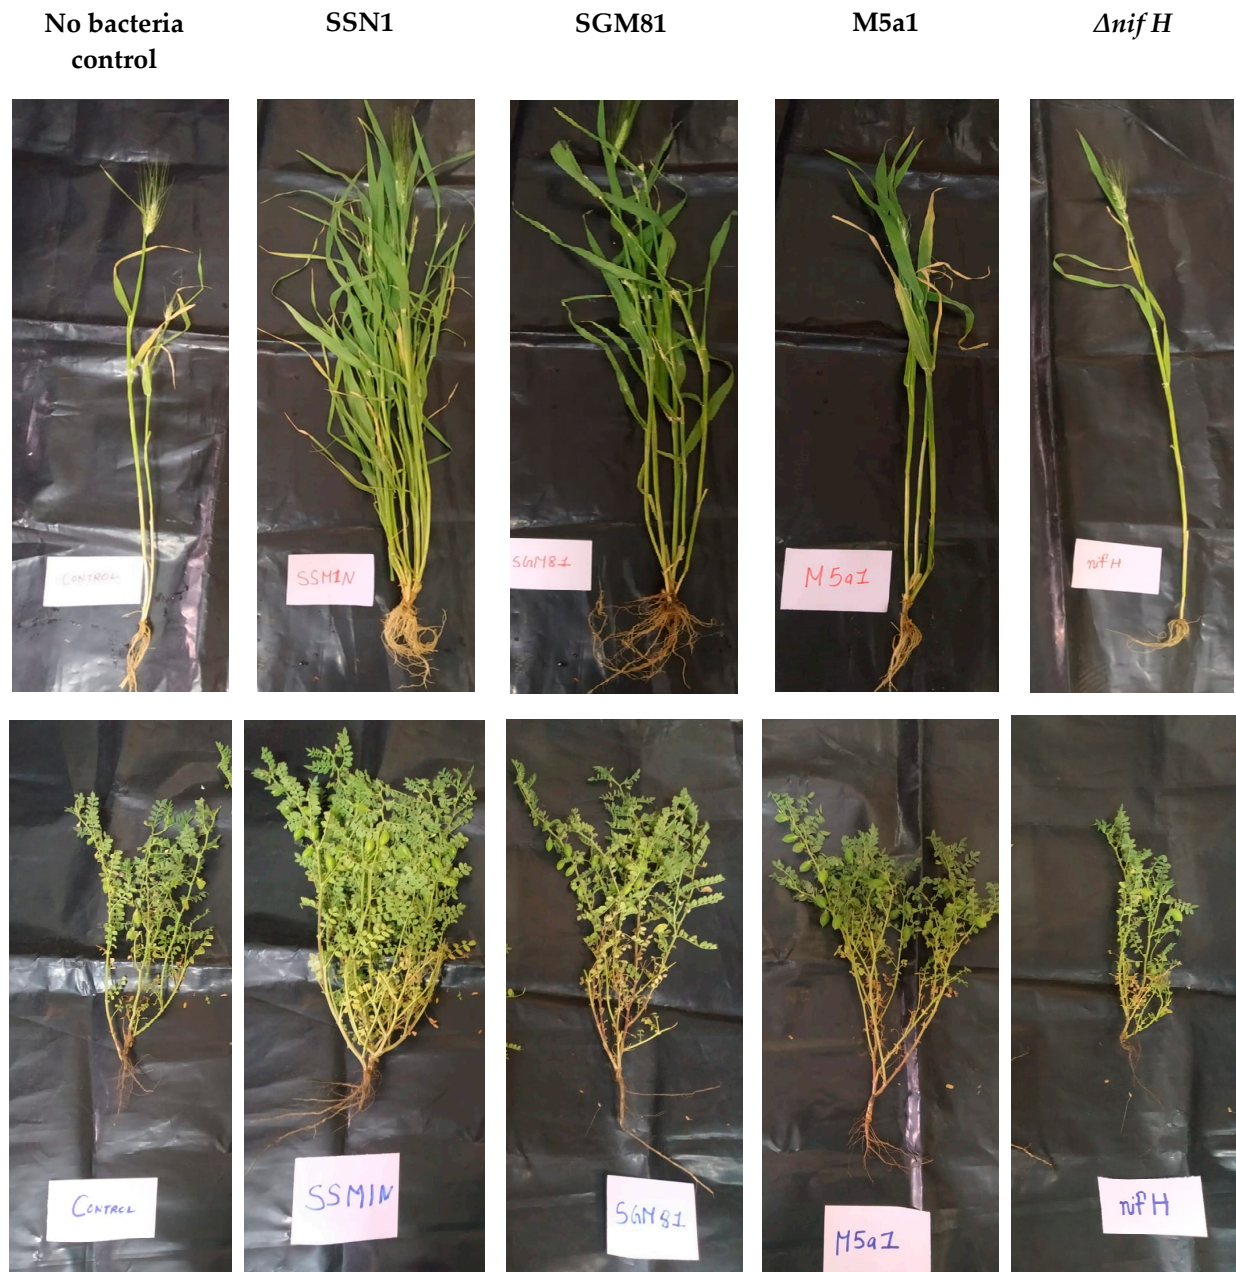

**Figure S3.** Plant morphology of barley (**A**) and chickpea (**B**) From left to right, no bacteria control, SSN1, SGM81, M5a1,  $\Delta nifH$  treatments

Supplementary Fig S4. Image Schema

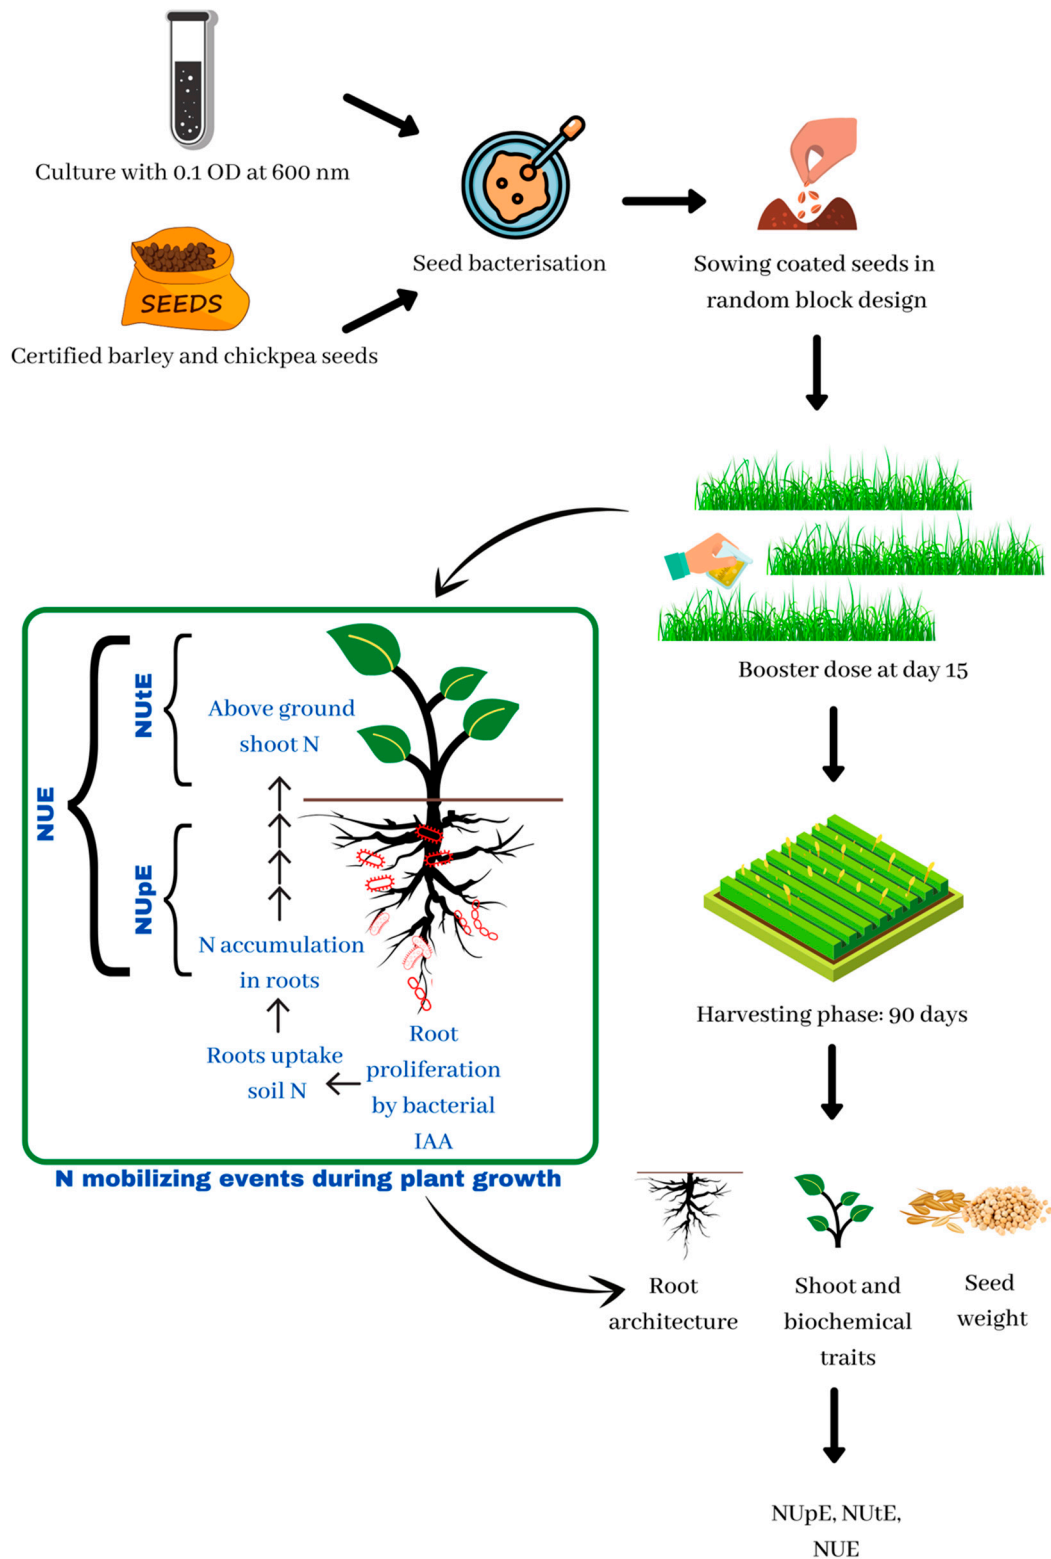

Supplementary Fig S4. Schematic representation of plant experimental set up.

Referen Flow chart shows the steps conducted for plant study

1. Schütz, A.; Sandalova, T.; Ricagno, S.; Hübner, G.; König, S.; Schneider, G. Crystal Structure of Thiamindiphosphate-dependent Indolepyruvate Decarboxylase from *Enterobacter Cloacae*, an Enzyme Involved in the Biosynthesis of the Plant Hormone Indole-3-acetic Acid. *Eur. J. Biochem.* **2003**, *270*, 2312–2321.
2. Barrios, H.; Valderrama, B.; Morett, E. Compilation and Analysis of  $\Sigma 54$ -Dependent Promoter Sequences. *Nucleic Acids Res.* **1999**, *27*, 4305–4313.
3. Buck, M. Deletion Analysis of the *Klebsiella Pneumoniae* Nitrogenase Promoter: Importance of Spacing between Conserved Sequences around Positions-12 and-24 for Activation by the NifA and NtrC (GlnG) Products. *J. Bacteriol.* **1986**, *166*, 545–551.
